# Supplementary material for: Non-Canonical Activin A Signaling Stimulates Context-Dependent and Cellular-Specific Outcomes in CRC to Promote Tumor Cell Migration and Immune Tolerance
Source: MDPI journal article supplement (doi:10.3390/cancers15113003), 2023-05-31
Supplement: s1 [file s1]

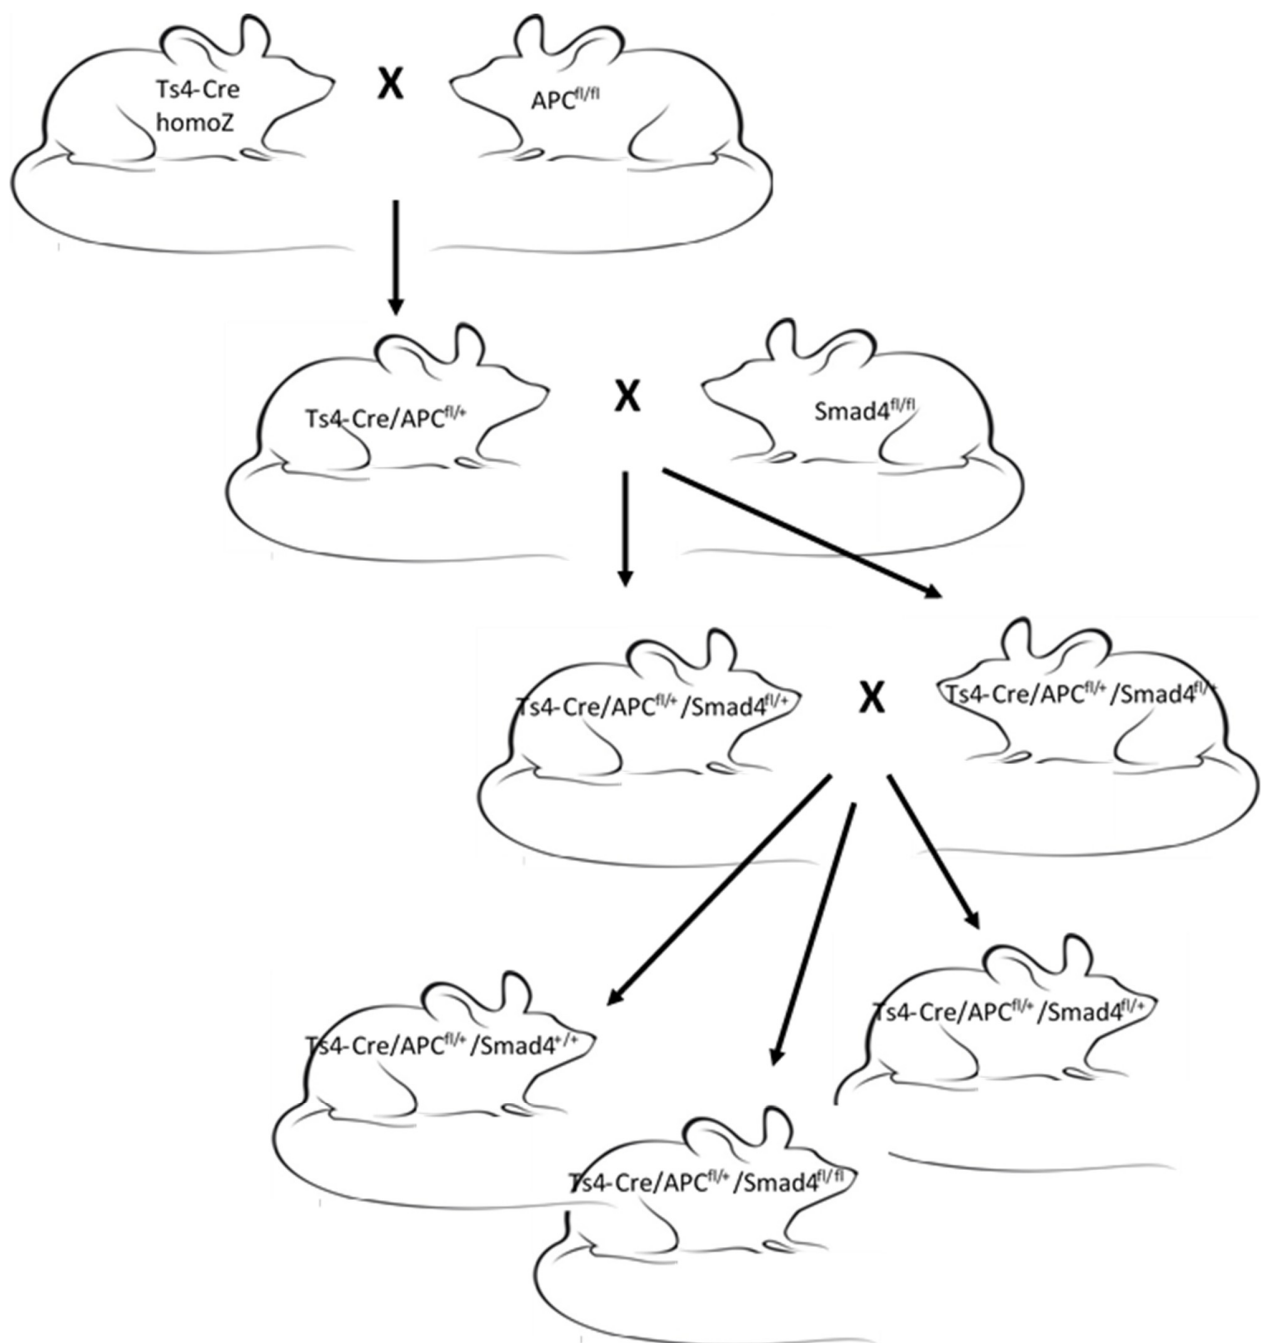

Primers:

**APC<sup>Δ468</sup>**

**Fapc up** 5' - GTA TTC TCA GTC TTA GCG TTC T -3'

**Fapc low** 5' - TTA ACA AGG GCA AAA GGA AAC - 3'

**Ts4-Cre**

**Ts4Cre 5'** 5' - TGA CCG TAC ACC AAA ATT TG -3'

**Ts4Cre 3'** 3' - ATT GCC CCT GTT TCA CTA TC -3'

**Reaction Components:**

| Reaction Component | Conc  | Volumes      |
|--------------------|-------|--------------|
| DNA                |       | 1 ul         |
| d H <sub>2</sub> O |       | 7 ul         |
| 2X GoTaq Mastermix | 10x   | 10 ul        |
| Primer 1           | 10 uM | 2 ul         |
| Primer 2           | 10 uM | 2 ul         |
| <b>total</b>       |       | <b>20 ul</b> |

**Cycling Conditions:****APC**

| Step     | Temperature | Time   | Note                    |
|----------|-------------|--------|-------------------------|
| <b>1</b> | 94 °C       | 5 min  |                         |
| <b>2</b> | 94 °C       | 45 sec |                         |
| <b>3</b> | 60 °C       | 45 sec | -1 °C per cycle         |
| <b>4</b> | 72 °C       | 1 min  | go to step 2 , 6 times  |
| <b>5</b> | 95 °C       | 30 sec |                         |
| <b>6</b> | 54 °C       | 30 sec |                         |
| <b>7</b> | 72 °C       | 30 sec | go to step 5 , 34 times |
| <b>8</b> | 72 °C       | 7 min  |                         |
| <b>9</b> | 4 °C        | ∞      |                         |

**Ts4-Cre**

| Step     | Temperature | Time   | Note                    |
|----------|-------------|--------|-------------------------|
| <b>1</b> | 94 °C       | 5 min  |                         |
| <b>2</b> | 94 °C       | 45 sec |                         |
| <b>3</b> | 60 °C       | 45 sec | -1 °C per cycle         |
| <b>4</b> | 72 °C       | 1 min  | go to step 2 , 6 times  |
| <b>5</b> | 95 °C       | 45 sec |                         |
| <b>6</b> | 54 °C       | 45 sec |                         |
| <b>7</b> | 72 °C       | 1 min  | go to step 5 , 31 times |
| <b>8</b> | 72 °C       | 7 min  |                         |
| <b>9</b> | 4 °C        | ∞      |                         |

- Separated by gel electrophoresis on a **2.0%** agarose gel
- Band size:  
 APC: +/+ 115bp (APC wt ), +/- 115bp/ 135bp (het), -/- 135 (APC exons 11+12 loxp )  
 Ts4-Cre 1000bp (positive; no band negative)

#### Sample Agarose Pictures:

##### APC

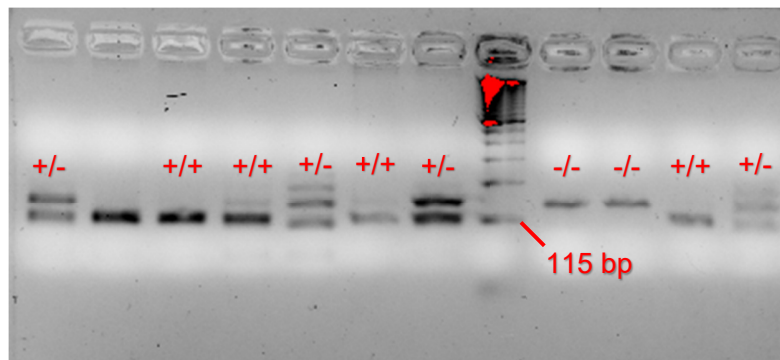

##### Ts4-Cre

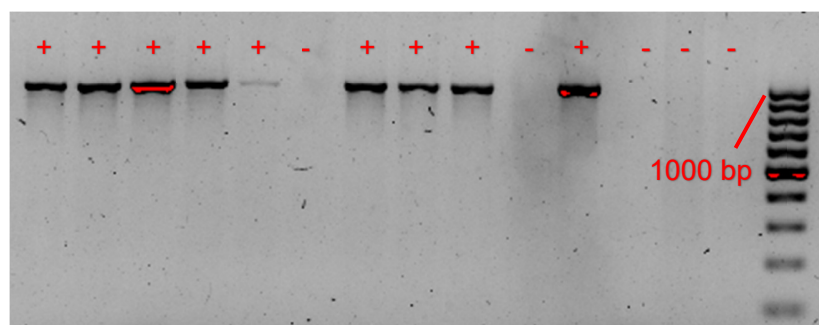

**Supplemental Figure S1:** Schematic of the genetic approach used to generate mice that develop polyps in the large intestine and lack the SMAD4 protein in the epithelial cells of the large intestine. PCR primer and cycle information and sample images from genotyping are also included.

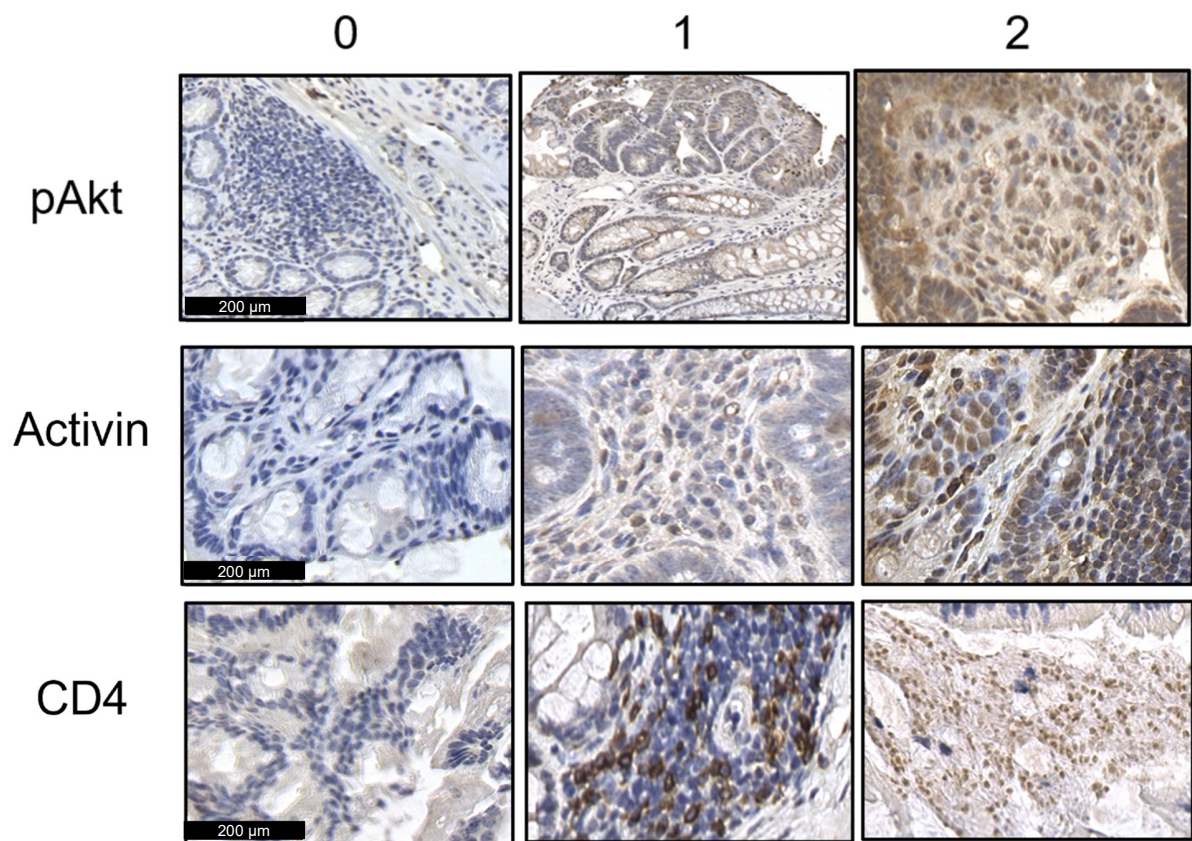

**Supplemental Figure S2:** Representative images of low (0, left column) medium (1, middle column) and high (2, right column) scores for pAkt (top row), activin (middle row), and CD4 (bottom row) from the colon of mice in the Ts4Cre/cAPC<sup>fllox</sup>/Smad4<sup>fllox</sup> experiments.

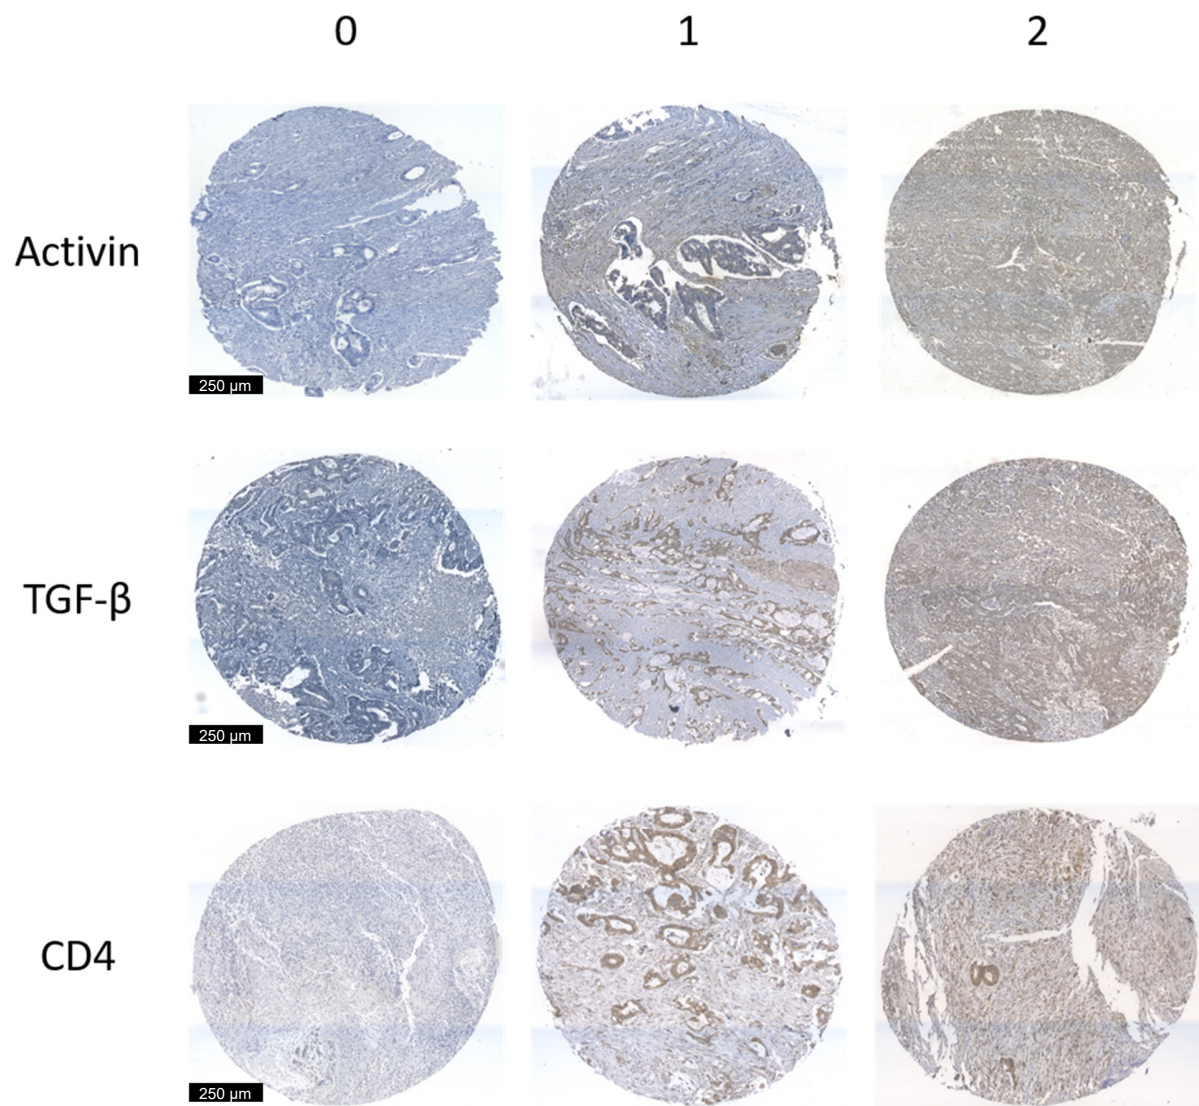

**Supplemental Figure S3:** Representative images of human CRC IHC images for low (0, left column), medium (1, middle column), and high (2, right column) scores for activin (top row), TGF- $\beta$  (middle row), and CD4 (bottom row).



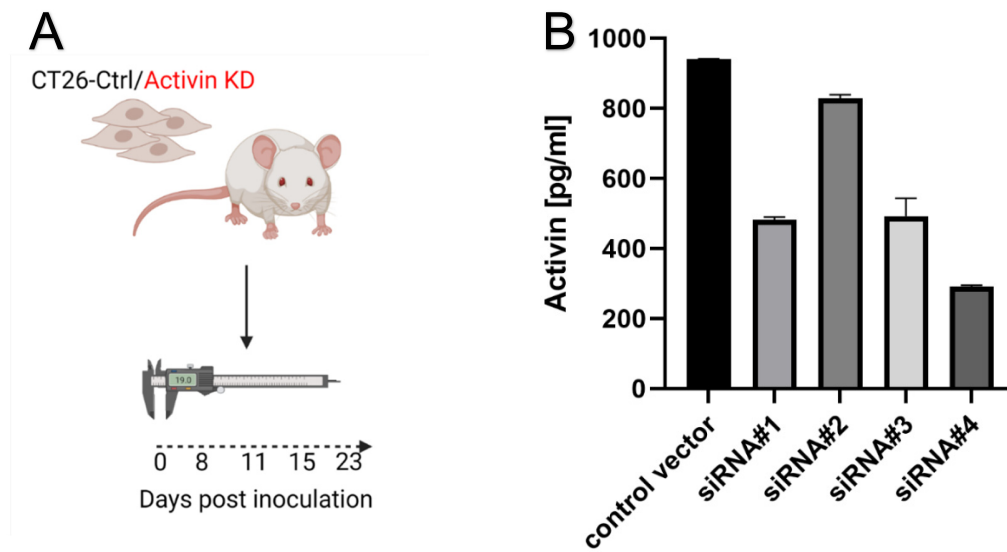

**Supplemental Figure S4: (A)** Schematic displaying the approach employed for the activin knockdown (KD) *in vivo* subcutaneous tumor model. Created with BioRender.com **(B)** ELISA data collected from CT26 cells treated with control vector siRNA or one of four siRNA variants which all targeted *INHBA*. Given the greatest decrease in Activin production in response to siRNA#4, this was the vector used in the mouse experiments.

**Supplemental Table S1:** List of the 57 quantitative markers employed in the DSP experiments including both positive and negative controls which were used for normalization.

| Immune Cell Profiling  |            |                             |       | Immune Cell Typing         |        |                     |          |
|------------------------|------------|-----------------------------|-------|----------------------------|--------|---------------------|----------|
| PD-1                   |            | CD45                        |       | FOXP3                      |        | FAP-alpha           |          |
| CTLA4                  |            | CD56                        |       | CD45RO                     |        | CD14                |          |
| HLA-DR                 |            | CD8                         |       | CD34                       |        | CD163               |          |
| Ki-67                  |            | CD68                        |       | CD66b                      |        |                     |          |
| Beta-2-macroglobulin   |            | GZMB                        |       | Immune Cell Phenotyping    |        |                     |          |
| CD11c                  |            | PD-L1                       |       | CD127                      |        | PD-L2               |          |
| CD20                   |            | PanCk                       |       | CD25                       |        | CD40                |          |
| CD3                    |            | SMA                         |       | CD80                       |        | CD44                |          |
| CD4                    |            | Fibronectin                 |       | ICOS                       |        | CD27                |          |
| MAPK Signaling Pathway |            |                             |       | PI3K/AKT Signaling Pathway |        |                     |          |
| EGFR                   |            | Phospho-MEK1                |       | Pan-AKT                    |        | Phospho-GSK3A/GSK3B |          |
| pan-RAS                |            | Phospho-p38 MAPK            |       | MET                        |        | INPP4B              |          |
| BRAF                   |            | Phospho-p44/42 MAPK ERK 1/2 |       | Phospho-AKT1               |        | PLCG1               |          |
| Phospho-c-RAF          |            | Phospho-p90 RSK             |       | Phospho-Tuberin            |        | Phospho-PRAS40      |          |
| Phospho-JNK            |            |                             |       | Phospho-GSK3B              |        |                     |          |
| Housekeeping Proteins  | Histone H3 | S6                          | GAPDH | Negative Controls          | Rb IgG | Ms IgG1             | Ms IgG2a |

**Supplemental Table S2:** Quantified data from the DSP study which is expressed as counts normalized using the approach described in the methods. Statistical differences between the groups were determined via Linear Mixed Modeling (LMM) with Benjamin-Hochberg correction test.

| Protein of Interest | Activin (+)<br>Tumor n = 10 | Activin (-)<br>Tumor n = 8 | Activin (+)<br>Stroma n = 18 | Activin (-)<br>Stroma n = 20 |
|---------------------|-----------------------------|----------------------------|------------------------------|------------------------------|
| $\alpha$ SMA        | 96.57 $\pm$ 28.61           | 87.03 $\pm$ 16.99          | 469.06 $\pm$ 123.14          | 646.45 $\pm$ 125.132         |
| PanCK               | 8.89 $\pm$ 2.26             | 5.44 $\pm$ 2.07            | 3.06 $\pm$ 1.01              | 2.21 $\pm$ 0.56              |
| CD45                | 2.35 $\pm$ 0.41             | 3.24 $\pm$ 0.73            | 6.67 $\pm$ 1.36              | 8.46 $\pm$ 1.28              |
| CD4                 | 1.17 $\pm$ 0.38             | 0.67 $\pm$ 0.16            | 2.16 $\pm$ 0.39              | 2.02 $\pm$ 0.21              |
| CD8                 | 1.04 $\pm$ 0.17             | 0.87 $\pm$ 0.18            | 2.63 $\pm$ 0.41              | 2.00 $\pm$ 0.32              |
| CTLA-4              | 14.49 $\pm$ 5.33            | 7.56 $\pm$ 5.44            | 19.21 $\pm$ 5.56             | 3.66 $\pm$ 0.82              |
| FOXP3               | 0.87 $\pm$ 0.28             | 0.21 $\pm$ 0.07            | 0.77 $\pm$ 0.20              | 0.27 $\pm$ 0.05              |
| CD25                | 0.82 $\pm$ 0.27             | 0.27 $\pm$ 0.07            | 0.95 $\pm$ 0.20              | 0.36 $\pm$ 0.08              |
| PD-1                | 1.97 $\pm$ 0.67             | 0.47 $\pm$ 0.13            | 1.47 $\pm$ 0.30              | 0.99 $\pm$ 0.16              |
| HLA-DR              | 2.47 $\pm$ 0.97             | 2.70 $\pm$ 1.31            | 4.71 $\pm$ 1.33              | 7.17 $\pm$ 2.15              |
| CD80                | 1.07 $\pm$ 0.35             | 0.16 $\pm$ 0.06            | 1.01 $\pm$ 0.28              | 0.32 $\pm$ 0.07              |
| CD40                | 0.91 $\pm$ 0.26             | 0.28 $\pm$ 0.15            | 1.00 $\pm$ 0.31              | 0.46 $\pm$ 0.14              |
| PLCG1               | 0.96 $\pm$ 0.23             | 0.40 $\pm$ 0.09            | 0.87 $\pm$ 0.20              | 0.41 $\pm$ 0.06              |
| Phospho-PRAS40      | 1.47 $\pm$ 0.61             | 0.25 $\pm$ 0.07            | 1.17 $\pm$ 0.38              | 0.34 $\pm$ 0.06              |
| Phospho-Tuberin     | 0.97 $\pm$ 0.28             | 0.22 $\pm$ 0.06            | 0.79 $\pm$ 0.19              | 0.34 $\pm$ 0.07              |



**Supplemental Table S3:** P-values for each significantly differentially expressed protein found in the DSP analysis. Statistical differences between the groups were determined via Linear Mixed Modeling (LMM) with Benjamin-Hochberg correction test.

| Protein of Interest | Activin (+) Tumor vs. Activin (-) Tumor | Activin (+) Stroma vs. Activin (-) Stroma | Activin (+) Tumor vs. Activin (+) Stroma | Activin (-) Tumor vs. Activin (-) Stroma |
|---------------------|-----------------------------------------|-------------------------------------------|------------------------------------------|------------------------------------------|
| $\alpha$ SMA        | <i>n.s.</i> p = 0.881                   | ** p = 0.0046                             | **** p = 0.00008                         | **** p = 5.997 x 10 <sup>-7</sup>        |
| PanCK               | * p = 0.0186                            | <i>n.s.</i> p = 0.316                     | **** p = 0.000036                        | * p = 0.036                              |
| CD45                | <i>n.s.</i> p = 0.182                   | * p = 0.0283                              | *** p = 0.00012                          | *** p = 0.00012                          |
| CD4                 | <i>n.s.</i> p = 0.164                   | <i>n.s.</i> p = 0.596                     | * p = 0.0242                             | *** p = 0.00023                          |
| CD8                 | <i>n.s.</i> p = 0.511                   | <i>n.s.</i> p = 0.304                     | * p = 0.0138                             | * p = 0.0227                             |
| CTLA-4              | ** p = 0.0033                           | *** p = 0.0003                            | <i>n.s.</i> p = 0.651                    | <i>n.s.</i> p = 0.417                    |
| FOXP3               | ** p = 0.00498                          | * p = 0.0151                              | <i>n.s.</i> p = 0.775                    | <i>n.s.</i> p = 0.375                    |
| CD25                | * p = 0.0286                            | ** p = 0.0093                             | <i>n.s.</i> p = 0.824                    | <i>n.s.</i> p = 0.836                    |
| PD-1                | * p = 0.0104                            | <i>n.s.</i> p = 0.504                     | <i>n.s.</i> p = 0.668                    | <i>n.s.</i> p = 0.0628                   |
| HLA-DR              | <i>n.s.</i> p = 0.462                   | ** p = 0.00604                            | <i>n.s.</i> p = 0.0552                   | *** p = 0.00041                          |
| CD80                | *** p = 0.00032                         | ** p = 0.0027                             | <i>n.s.</i> p = 0.899                    | <i>n.s.</i> p = 0.111                    |
| CD40                | * p = 0.0131                            | * p = 0.0231                              | <i>n.s.</i> p = 0.725                    | <i>n.s.</i> p = 0.122                    |
| PLCG1               | * p = 0.0245                            | * p = 0.0218                              | <i>n.s.</i> p = 0.576                    | <i>n.s.</i> p = 0.820                    |
| Phospho-PRAS40      | ** p = 0.0045                           | * p = 0.023                               | <i>n.s.</i> p = 0.538                    | <i>n.s.</i> p = 0.357                    |
| Phospho-Tuberin     | ** p = 0.0013                           | ** p = 0.00598                            | <i>n.s.</i> p = 0.663                    | <i>n.s.</i> p = 0.272                    |
